# Supplementary material
Source: PubMed Central journal article supplement (PMC1599978)
Supplement: pnas_0606571103_1.pdf [file pnas_0606571103_1.pdf]

**Table 2. The complete list of the 103 gene probes**

| Transcript      | Control*   | HU*        | Control/HU† | <i>P</i> ‡  | Functional category          |
|-----------------|------------|------------|-------------|-------------|------------------------------|
| CG4842          | 0.62120366 | 0.08597007 | 7.225813123 | 0.041903717 | Metabolic enzyme             |
| CG13244         | 0.88593566 | 0.12602329 | 7.029935975 | 0.026534949 | Unknown function             |
| CG13297         | 0.8580723  | 0.13925481 | 6.161886257 | 0.019176568 | Unknown function             |
| CG32473         | 1.116919   | 0.1985642  | 5.624976708 | 0.000945086 | Proteolysis and peptidolysis |
| Rab10           | 0.9745181  | 0.18009323 | 5.41118675  | 0.002215184 | Other function               |
| CG12866         | 1.069942   | 0.21671154 | 4.93717132  | 0.001438827 | Channel and transporter      |
| CG5476          | 0.6407198  | 0.13052787 | 4.908681954 | 0.03582609  | Unknown function             |
| CG18266         | 0.7340551  | 0.16247323 | 4.518006443 | 0.018687103 | Unknown function             |
| Kif3C (CG17461) | 0.642304   | 0.14294009 | 4.493518928 | 0.027082064 | Cytoskeletal component       |
| CG13312         | 0.7033072  | 0.16542795 | 4.251441186 | 0.004251386 | Unknown function             |
| CG2070          | 0.78866506 | 0.1883391  | 4.18747387  | 0.004086318 | Metabolic enzyme             |
| CG2196          | 0.5167162  | 0.12433376 | 4.155880109 | 0.043902138 | Channel and transporter      |
| CG13350         | 1.6129706  | 0.40935668 | 3.940257186 | 0.004890306 | DNA/RNA binding              |
| CG11164         | 0.54253936 | 0.13870656 | 3.911418177 | 0.027800502 | Unknown function             |
| CG14313         | 1.2044793  | 0.3086713  | 3.902142182 | 0.031750815 | Unknown function             |
| CG13566         | 1.0102236  | 0.26260048 | 3.846998299 | 0.003480984 | Unknown function             |
| CG32676         | 0.6017328  | 0.15967444 | 3.768497951 | 0.014603726 | Metabolic enzyme             |
| Hr46            | 0.7447138  | 0.21342456 | 3.489353803 | 0.022341466 | Transcription                |
| Dhod            | 1.2143683  | 0.34879887 | 3.481571772 | 0.047043204 | Metabolic enzyme             |
| CG14446         | 1.5227469  | 0.4586867  | 3.319797369 | 0.014390305 | Unknown function             |
| CG2267          | 0.6127484  | 0.19564371 | 3.131960644 | 0.004936265 | Unknown function             |
| CG3994          | 0.92971987 | 0.2980912  | 3.118910823 | 0.043875327 | Channel and transporter      |
| CG15185         | 1.032592   | 0.34153596 | 3.023377099 | 0.032572662 | Unknown function             |
| CG14350         | 0.97661704 | 0.3237962  | 3.016147317 | 0.047763205 | Existence-uncertain gene     |

**Table 2. The complete list of the 103 gene probes**

|         |            |            |             |             |                              |
|---------|------------|------------|-------------|-------------|------------------------------|
| CG14014 | 1.3587749  | 0.45256904 | 3.002359375 | 0.019445448 | Other function               |
| CG14628 | 0.89648676 | 0.2992783  | 2.995495363 | 0.035018514 | DNA/RNA binding              |
| CG3371  | 1.2696533  | 0.4261838  | 2.979121449 | 0.038104515 | DNA/RNA binding              |
| CG3818  | 0.8604355  | 0.29154265 | 2.951319472 | 0.043480413 | Other function               |
| CG14911 | 0.75341684 | 0.26623556 | 2.829888089 | 0.021047885 | Unknown function             |
| CG4575  | 0.9942012  | 0.3559386  | 2.793181745 | 0.007799474 | Transcription                |
| CG14460 | 0.72721463 | 0.27166274 | 2.676902361 | 0.022337944 | Unknown function             |
| CG10205 | 1.2248445  | 0.45870465 | 2.67022473  | 0.020574162 | Unknown function             |
| fkh     | 0.8734546  | 0.32807544 | 2.662358999 | 0.049245175 | Transcription                |
| trio    | 0.67975944 | 0.2559854  | 2.655461757 | 0.018048142 | Signaling                    |
| CG33143 | 0.6361374  | 0.2408915  | 2.640763165 | 0.020769898 | Other function               |
| CG13444 | 1.4296904  | 0.54238164 | 2.635949108 | 0.011454441 | Channel and transporter      |
| CG7945  | 1.343363   | 0.52288735 | 2.569125071 | 0.030503629 | Other function               |
| jing    | 1.6422457  | 0.6762096  | 2.428604533 | 0.007763174 | Transcription                |
| CG6974  | 0.65079576 | 0.28037432 | 2.321167502 | 0.02231156  | Proteolysis and peptidolysis |
| CG7846  | 1.4918656  | 0.6512441  | 2.290793268 | 0.019468361 | Cytoskeletal component       |
| CG13716 | 0.6227518  | 0.2966155  | 2.09952548  | 0.032279552 | Unknown function             |
| CG12301 | 1.1438428  | 0.54607886 | 2.094647649 | 0.020210569 | Other function               |
| CG4940  | 1.334251   | 0.6372656  | 2.093712574 | 0.044957735 | Unknown function             |
| CG10505 | 0.7553747  | 0.36574423 | 2.06530859  | 0.004793401 | Channel and transporter      |
| CG31559 | 0.9356782  | 0.45937234 | 2.036862298 | 0.016356365 | Channel and transporter      |
| CG6372  | 0.543297   | 0.2681848  | 2.025830696 | 0.01817835  | Proteolysis and peptidolysis |
| CG31530 | 0.56348175 | 0.28044647 | 2.009231031 | 0.03223217  | Channel and transporter      |
| Brf     | 1.2662749  | 0.6318126  | 2.004193807 | 0.044252611 | Transcription                |
| CG12744 | 1.1669402  | 0.58361876 | 1.999490558 | 0.048008803 | Other function               |

**Table 2. The complete list of the 103 gene probes**

|                 |            |            |             |             |                         |
|-----------------|------------|------------|-------------|-------------|-------------------------|
| CG13604         | 1.2823262  | 0.66222966 | 1.936376876 | 0.005377419 | Unknown function        |
| klg             | 1.4166996  | 0.74138844 | 1.910873604 | 0.007996672 | Cell adhesion           |
| CG15057         | 1.3013203  | 0.6921264  | 1.880177234 | 0.026333796 | Unknown function        |
| RluA-1          | 1.3239578  | 0.70624053 | 1.87465565  | 0.006681915 | DNA/RNA binding         |
| CG13159         | 1.4359236  | 0.775147   | 1.852453277 | 0.044429414 | Unknown function        |
| ey              | 1.326726   | 0.72115475 | 1.839724414 | 0.000640844 | Transcription           |
| CG17319         | 1.3354533  | 0.72651273 | 1.838169167 | 0.002320462 | Unknown function        |
| CG11178         | 1.3806639  | 0.75597507 | 1.826335226 | 0.029038908 | Unknown function        |
| Kif3C (CG17459) | 0.80010986 | 0.43961567 | 1.820021247 | 0.026527212 | Cytoskeletal component  |
| CG8412          | 1.3024764  | 0.7240048  | 1.798988625 | 0.002113087 | Metabolic enzyme        |
| CG17221         | 1.3830123  | 0.77424556 | 1.786270883 | 0.010107509 | Metabolic enzyme        |
| CG13176         | 1.2768408  | 0.71816385 | 1.777924077 | 0.035108495 | Transcription           |
| CG9296          | 1.3009821  | 0.73469734 | 1.770772846 | 0.008231768 | Signaling               |
| Hrb87F          | 1.3284181  | 0.75198746 | 1.766542889 | 0.035787748 | DNA/RNA binding         |
| CG12253         | 1.2745266  | 0.72188824 | 1.765545592 | 0.005403967 | Unknown function        |
| CG15579         | 1.3062333  | 0.74874055 | 1.744574005 | 0.008359675 | Unknown function        |
| CG13879         | 0.6955133  | 0.40191934 | 1.730479802 | 0.048178831 | Unknown function        |
| CG1234          | 1.2869878  | 0.7448268  | 1.727902111 | 0.002233795 | Unknown function        |
| ltp-r83A        | 1.2440314  | 0.7322822  | 1.698841512 | 0.028087255 | Signaling               |
| CG3983          | 1.1087883  | 0.6560402  | 1.690122496 | 0.03552447  | Signaling               |
| CG6083          | 1.2994611  | 0.7707109  | 1.686055173 | 0.045103515 | Metabolic enzyme        |
| PP2A-B'         | 1.161467   | 0.690583   | 1.681864454 | 0.044209208 | Signaling               |
| Sema-1a         | 1.3625939  | 0.81081873 | 1.680516063 | 0.024452729 | Signaling               |
| elk             | 1.2432847  | 0.7452786  | 1.668214678 | 0.049328179 | Channel and transporter |
| Atg5            | 1.3488524  | 0.8106     | 1.664017271 | 0.027621725 | Other function          |

**Table 2. The complete list of the 103 gene probes**

|           |           |            |             |             |                              |
|-----------|-----------|------------|-------------|-------------|------------------------------|
| CG4853    | 1.286643  | 0.77333194 | 1.663765498 | 0.020183216 | Signaling                    |
| RN-tre    | 0.7963538 | 0.47925064 | 1.661664552 | 0.012891125 | Cell adhesion                |
| Pkn       | 0.9298963 | 0.56370634 | 1.649611214 | 0.027029908 | Signaling                    |
| CG10948   | 1.256458  | 0.773693   | 1.623974884 | 0.035747802 | DNA/RNA binding              |
| Nep1      | 1.2786309 | 0.78752583 | 1.623605031 | 0.016998033 | Proteolysis and peptidolysis |
| CG5669    | 1.2916471 | 0.80355585 | 1.60741422  | 0.044701357 | DNA/RNA binding              |
| CG10880   | 1.2182193 | 0.75835884 | 1.606389002 | 0.007009798 | Unknown function             |
| CG13213   | 1.1837968 | 0.73825985 | 1.603496113 | 0.045421652 | Metabolic enzyme             |
| CG16803   | 1.3160511 | 0.8213089  | 1.602382611 | 0.022331094 | Existence-uncertain gene     |
| CG10083   | 1.1961869 | 0.7485394  | 1.598027973 | 0.027550075 | Cytoskeletal component       |
| CG14483   | 1.3165572 | 0.8308509  | 1.584589004 | 0.011896991 | Unknown function             |
| Rpb11     | 1.2870793 | 0.8130244  | 1.583075858 | 0.035099475 | DNA/RNA binding              |
| Dp1       | 1.1898068 | 0.7525036  | 1.58113104  | 0.045426871 | DNA/RNA binding              |
| mod(mdg4) | 1.2520987 | 0.79475975 | 1.575443019 | 0.001930805 | Transcription                |
| CG5384    | 1.2303114 | 0.7811922  | 1.574915111 | 0.037242924 | Proteolysis and peptidolysis |
| tra2      | 1.2459004 | 0.79328823 | 1.57055198  | 0.026421175 | DNA/RNA binding              |
| usp       | 1.2848113 | 0.8264749  | 1.55456784  | 0.018507156 | Transcription                |
| fra       | 1.2037536 | 0.77479035 | 1.553650739 | 0.023309958 | Cell adhesion                |
| CG7328    | 1.2617912 | 0.8200672  | 1.538643662 | 0.008263914 | Metabolic enzyme             |
| CG3305    | 1.2219881 | 0.7958872  | 1.535378506 | 0.021659607 | Other function               |
| CG13004   | 1.2544899 | 0.81922567 | 1.531311757 | 0.007160437 | Unknown function             |
| CG2915    | 1.1752964 | 0.7677926  | 1.530747236 | 0.047374181 | Proteolysis and peptidolysis |
| CG9839    | 1.1967986 | 0.7829864  | 1.528504965 | 0.009522896 | Unknown function             |
| CG4287    | 1.2098343 | 0.79151803 | 1.528498725 | 0.018154626 | Unknown function             |
| apt       | 1.2301352 | 0.8140435  | 1.511141849 | 0.010257268 | Transcription                |

**Table 2. The complete list of the 103 gene probes**

|         |           |            |             |             |                  |
|---------|-----------|------------|-------------|-------------|------------------|
| PHDP    | 1.2285808 | 0.8130407  | 1.511093848 | 0.022832258 | Transcription    |
| CG12252 | 1.2362815 | 0.8186447  | 1.51015636  | 0.0095676   | Transcription    |
| CG9248  | 1.166326  | 0.7727544  | 1.509310073 | 0.045361564 | Metabolic enzyme |
| Sara    | 1.1719639 | 0.78052014 | 1.50151654  | 0.041912054 | Signaling        |

The microarray probes that exhibited Control/HU fold change > 1.5 with  $p < 0.05$  by Welch  $t$  test are listed on the descending order of the Control/HU value. Note that Kif3C is represented twice by two independent oligonucleotide probes on the microarray. The existence of CG14351 and CG16803 are uncertain and eliminated in the recent genome annotation.

\*Microarray signals of the non-ablated control and HU-treated samples after MAS 5.0 normalization.

†Ratios of the Control signal to the HU signal.

‡Welch  $t$  test.
