# Supplementary material
Source: PubMed Central journal article supplement (PMC1599978)
Supplement: pnas_0606571103_2.pdf [file pnas_0606571103_2.pdf]

**Table 3. Summary of *in situ* hybridization**

| Gene    | Probe*      | Distribution of hybridization signals in MBs† |      |      |      | No. of MBs | Total point‡ | Rank‡ |
|---------|-------------|-----------------------------------------------|------|------|------|------------|--------------|-------|
|         |             | (-)                                           | (±)  | (+)  | (++) |            |              |       |
| CG4842  | GH15220     | 96.7                                          | 3.3  | 0.0  | 0.0  | 30         | 3.3          | D     |
| CG13244 | GH27987     | 100.0                                         | 0.0  | 0.0  | 0.0  | 42         | 0.0          | D     |
| CG13297 | RE64858     | 66.7                                          | 33.3 | 0.0  | 0.0  | 24         | 33.3         | C     |
| CG32473 | RE62048     | 68.3                                          | 0.0  | 31.7 | 0.0  | 60         | 63.4         | B     |
| Rab10   | LD39986     | 3.1                                           | 15.6 | 43.8 | 37.5 | 32         | 215.7        | A     |
| CG12866 | Genomic PCR | 83.3                                          | 16.7 | 0.0  | 0.0  | 24         | 16.7         | D     |
| CG5476  | RE59605     | 23.3                                          | 10.0 | 46.7 | 20.0 | 30         | 163.4        | A     |
| CG18266 | GH11218     | 63.3                                          | 23.3 | 6.7  | 6.7  | 30         | 56.8         | B     |
| Kif3C   | GH04118     | 63.2                                          | 10.5 | 7.9  | 18.4 | 38         | 81.5         | B     |
| CG13312 | Genomic PCR | 60.7                                          | 28.6 | 10.7 | 0.0  | 28         | 50.0         | B     |
| CG2070  | LP06328     | 35.3                                          | 26.5 | 26.5 | 11.8 | 34         | 114.9        | A     |
| CG2196  | Genomic PCR | 29.4                                          | 17.6 | 26.5 | 26.5 | 34         | 150.1        | A     |
| CG13350 | SD03057     | 81.3                                          | 12.5 | 6.3  | 0.0  | 32         | 25.1         | C     |
| CG11164 | RE50056     | 100.0                                         | 0.0  | 0.0  | 0.0  | 32         | 0.0          | D     |
| CG14313 | Genomic PCR | 87.5                                          | 0.0  | 12.5 | 0.0  | 56         | 25.0         | C     |
| CG13566 | Genomic PCR | 92.6                                          | 7.4  | 0.0  | 0.0  | 27         | 7.4          | D     |
| CG32676 | GH03394     | 69.2                                          | 3.8  | 15.4 | 11.5 | 26         | 69.1         | B     |
| Hr46    | GH21112     | 36.0                                          | 0.0  | 20.0 | 44.0 | 50         | 172.0        | A     |
| Dhod    | GH24729     | 81.2                                          | 0.0  | 18.8 | 0.0  | 80         | 37.6         | C     |
| CG14446 | GM27257     | 62.9                                          | 0.0  | 37.1 | 0.0  | 62         | 74.2         | B     |
| CG2267  | GH11073     | 28.9                                          | 10.5 | 13.2 | 47.4 | 38         | 179.1        | A     |
| CG3994  | RE54080     | 90.0                                          | 10.0 | 0.0  | 0.0  | 30         | 10.0         | D     |
| CG15185 | Genomic PCR | 56.8                                          | 27.3 | 6.8  | 9.1  | 44         | 68.2         | B     |

**Table 3. Summary of *in situ* hybridization**

|         |             |       |      |      |      |    |       |   |
|---------|-------------|-------|------|------|------|----|-------|---|
| CG14014 | RE73577     | 45.5  | 0.0  | 54.5 | 0.0  | 22 | 109.0 | A |
| CG14628 | Genomic PCR | 94.7  | 5.3  | 0.0  | 0.0  | 38 | 5.3   | D |
| CG3371  | GH13810     | 85.5  | 0.0  | 14.5 | 0.0  | 62 | 29.0  | C |
| CG3818  | Genomic PCR | 76.7  | 23.3 | 0.0  | 0.0  | 30 | 23.3  | C |
| CG14911 | Genomic PCR | 38.5  | 26.9 | 34.6 | 0.0  | 26 | 96.1  | B |
| CG4575  | Genomic PCR | 100.0 | 0.0  | 0.0  | 0.0  | 32 | 0.0   | D |
| CG14460 | Genomic PCR | 100.0 | 0.0  | 0.0  | 0.0  | 30 | 0.0   | D |
| CG10205 | LP09070     | 100.0 | 0.0  | 0.0  | 0.0  | 26 | 0.0   | D |
| fkh     | RE03865     | 41.2  | 0.0  | 38.2 | 20.6 | 68 | 138.2 | A |
| trio    | GH01987     | 50.0  | 21.9 | 28.1 | 0.0  | 32 | 78.1  | B |
| CG33143 | Genomic PCR | 80.0  | 6.7  | 3.3  | 10.0 | 30 | 43.3  | C |
| CG13444 | RE33441     | 82.1  | 0.0  | 3.6  | 14.3 | 28 | 50.1  | B |
| CG7945  | LD01950     | 37.5  | 0.0  | 62.5 | 0.0  | 32 | 125.0 | A |
| jing    | LD36562     | 45.3  | 0.0  | 54.7 | 0.0  | 86 | 109.4 | A |
| CG6974  | Genomic PCR | 94.1  | 5.9  | 0.0  | 0.0  | 34 | 5.9   | D |
| CG7846  | LD24980     | 96.4  | 3.6  | 0.0  | 0.0  | 28 | 3.6   | D |
| CG13716 | Genomic PCR | 84.4  | 12.5 | 3.1  | 0.0  | 32 | 18.7  | D |
| CG12301 | LD31322     | 73.8  | 0.0  | 26.2 | 0.0  | 42 | 52.4  | B |
| CG4940  | Genomic PCR | 79.2  | 16.7 | 4.2  | 0.0  | 24 | 25.1  | C |
| CG10505 | Genomic PCR | 96.9  | 0.0  | 0.0  | 3.1  | 32 | 9.3   | D |
| CG31559 | RE15313     | 33.3  | 66.7 | 0.0  | 0.0  | 30 | 66.7  | B |
| CG6372  | GH13022     | 80.6  | 0.0  | 19.4 | 0.0  | 36 | 38.8  | C |
| CG31530 | RE24196     | 9.4   | 0.0  | 15.6 | 75.0 | 32 | 256.2 | A |
| Brf     | LD32109     | 50.0  | 0.0  | 50.0 | 0.0  | 12 | 100.0 | A |
| CG12744 | GH03826     | 100.0 | 0.0  | 0.0  | 0.0  | 48 | 0.0   | D |

**Table 3. Summary of *in situ* hybridization**

|          |              |      |      |      |      |    |       |   |
|----------|--------------|------|------|------|------|----|-------|---|
| CG13604  | LD48066      | 65.4 | 3.8  | 23.1 | 7.7  | 26 | 73.1  | B |
| klg      | GH05072      | 74.0 | 0.0  | 24.0 | 2.0  | 50 | 54.0  | B |
| CG15057  | Genomic PCR  | 93.3 | 6.7  | 0.0  | 0.0  | 30 | 6.7   | D |
| RluA-1   | RH09496      | 66.7 | 33.3 | 0.0  | 0.0  | 30 | 33.3  | C |
| CG13159  | RE25177      | 96.4 | 3.6  | 0.0  | 0.0  | 28 | 3.6   | D |
| ey       | pBSEyE10.1.1 | 33.3 | 0.0  | 31.3 | 35.4 | 48 | 168.8 | A |
| CG17319  | Genomic PCR  | 15.8 | 3.7  | 57.9 | 2.6  | 38 | 127.3 | A |
| CG11178  | LD19061      | 61.8 | 0.0  | 29.4 | 8.8  | 34 | 85.2  | B |
| CG8412   | RE17513      | 0.0  | 10.0 | 13.3 | 76.7 | 30 | 266.7 | A |
| CG17221  | RH24774      | 69.2 | 7.7  | 23.1 | 0.0  | 26 | 53.9  | B |
| CG13176  | RH05781      | 75.0 | 3.6  | 21.4 | 0.0  | 28 | 46.4  | C |
| CG9296   | RE06748      | 10.7 | 35.7 | 42.9 | 10.7 | 28 | 153.6 | A |
| Hrb87F   | GH05625      | 76.7 | 0.0  | 23.3 | 0.0  | 86 | 46.6  | C |
| CG12253  | LD32974      | 97.6 | 2.4  | 0.0  | 0.0  | 41 | 2.4   | D |
| CG15579  | Genomic PCR  | 97.1 | 2.9  | 0.0  | 0.0  | 34 | 2.9   | D |
| CG13879  | Genomic PCR  | 70.4 | 18.5 | 0.0  | 11.1 | 27 | 51.8  | B |
| CG1234   | LD35257      | 71.9 | 18.8 | 9.4  | 0.0  | 32 | 37.6  | C |
| ltp-r83A | Genomic PCR  | 70.6 | 8.8  | 8.8  | 11.8 | 34 | 61.8  | B |
| CG3983   | AT23067      | 20.0 | 26.7 | 23.3 | 30.0 | 30 | 163.3 | A |
| CG6083   | AT02556      | 97.2 | 2.8  | 0.0  | 0.0  | 36 | 2.8   | D |
| PP2A-B'  | LD29902      | 38.9 | 0.0  | 19.4 | 41.7 | 36 | 163.9 | A |
| Sema-1a  | RE36155      | 41.2 | 8.8  | 11.8 | 38.2 | 34 | 147.0 | A |
| elk      | HL01061      | 56.7 | 0.0  | 43.3 | 0.0  | 30 | 86.6  | B |
| Atg5     | LD34980      | 94.1 | 5.9  | 0.0  | 0.0  | 34 | 5.9   | D |
| CG4853   | GH27815      | 92.9 | 0.0  | 0.0  | 7.1  | 28 | 21.3  | C |

**Table 3. Summary of *in situ* hybridization**

|                  |                    |              |             |             |             |           |              |          |
|------------------|--------------------|--------------|-------------|-------------|-------------|-----------|--------------|----------|
| <b>RN-tre</b>    | <b>LD31492</b>     | <b>66.7</b>  | <b>0.0</b>  | <b>33.3</b> | <b>0.0</b>  | <b>96</b> | <b>99.9</b>  | <b>B</b> |
| <b>Pkn</b>       | <b>RH55776</b>     | <b>7.7</b>   | <b>0.0</b>  | <b>11.5</b> | <b>80.8</b> | <b>26</b> | <b>265.4</b> | <b>A</b> |
| <b>CG10948</b>   | <b>RE29010</b>     | <b>81.0</b>  | <b>0.0</b>  | <b>19.0</b> | <b>0.0</b>  | <b>58</b> | <b>38.0</b>  | <b>C</b> |
| <b>Nep1</b>      | <b>GH03315</b>     | <b>50.0</b>  | <b>0.0</b>  | <b>36.7</b> | <b>13.3</b> | <b>60</b> | <b>113.3</b> | <b>A</b> |
| <b>CG5669</b>    | <b>LD04007</b>     | <b>58.8</b>  | <b>0.0</b>  | <b>11.8</b> | <b>29.4</b> | <b>34</b> | <b>111.8</b> | <b>A</b> |
| <b>CG10880</b>   | <b>LD25288</b>     | <b>94.1</b>  | <b>5.9</b>  | <b>0.0</b>  | <b>0.0</b>  | <b>34</b> | <b>5.9</b>   | <b>D</b> |
| <b>CG13213</b>   | <b>SD01170</b>     | <b>40.9</b>  | <b>0.0</b>  | <b>59.1</b> | <b>0.0</b>  | <b>22</b> | <b>118.2</b> | <b>A</b> |
| <b>CG10083</b>   | <b>SD28142</b>     | <b>100.0</b> | <b>0.0</b>  | <b>0.0</b>  | <b>0.0</b>  | <b>32</b> | <b>0.0</b>   | <b>D</b> |
| <b>CG14483</b>   | <b>Genomic PCR</b> | <b>93.8</b>  | <b>6.3</b>  | <b>0.0</b>  | <b>0.0</b>  | <b>32</b> | <b>6.3</b>   | <b>D</b> |
| <b>Rpb11</b>     | <b>GM15177</b>     | <b>92.6</b>  | <b>0.0</b>  | <b>7.4</b>  | <b>0.0</b>  | <b>54</b> | <b>14.8</b>  | <b>D</b> |
| <b>Dp1</b>       | <b>SD20908</b>     | <b>58.6</b>  | <b>0.0</b>  | <b>35.7</b> | <b>5.7</b>  | <b>70</b> | <b>88.5</b>  | <b>B</b> |
| <b>mod(mdg4)</b> | <b>SD03001</b>     | <b>57.9</b>  | <b>0.0</b>  | <b>42.1</b> | <b>0.0</b>  | <b>76</b> | <b>84.2</b>  | <b>B</b> |
| <b>CG5384</b>    | <b>LD26251</b>     | <b>43.3</b>  | <b>16.7</b> | <b>10.0</b> | <b>30.0</b> | <b>30</b> | <b>126.7</b> | <b>A</b> |
| <b>tra2</b>      | <b>RH39422</b>     | <b>64.8</b>  | <b>0.0</b>  | <b>35.2</b> | <b>0.0</b>  | <b>88</b> | <b>70.4</b>  | <b>B</b> |
| <b>usp</b>       | <b>LD09973</b>     | <b>72.7</b>  | <b>0.0</b>  | <b>27.3</b> | <b>0.0</b>  | <b>22</b> | <b>54.6</b>  | <b>B</b> |
| <b>fra</b>       | <b>RE61427</b>     | <b>42.3</b>  | <b>38.5</b> | <b>11.5</b> | <b>7.7</b>  | <b>26</b> | <b>84.6</b>  | <b>B</b> |
| <b>CG7328</b>    | <b>RE49431</b>     | <b>60.0</b>  | <b>0.0</b>  | <b>40.0</b> | <b>0.0</b>  | <b>30</b> | <b>80.0</b>  | <b>B</b> |
| <b>CG3305</b>    | <b>RE72002</b>     | <b>71.4</b>  | <b>21.4</b> | <b>3.6</b>  | <b>3.6</b>  | <b>28</b> | <b>39.4</b>  | <b>C</b> |
| <b>CG13004</b>   | <b>AT03755</b>     | <b>92.9</b>  | <b>7.1</b>  | <b>0.0</b>  | <b>0.0</b>  | <b>28</b> | <b>7.1</b>   | <b>D</b> |
| <b>CG2915</b>    | <b>SD12095</b>     | <b>36.7</b>  | <b>10.0</b> | <b>53.3</b> | <b>0.0</b>  | <b>30</b> | <b>116.6</b> | <b>A</b> |
| <b>CG9839</b>    | <b>LD40589</b>     | <b>100.0</b> | <b>0.0</b>  | <b>0.0</b>  | <b>0.0</b>  | <b>30</b> | <b>0.0</b>   | <b>D</b> |
| <b>CG4287</b>    | <b>GH08991</b>     | <b>81.8</b>  | <b>18.2</b> | <b>0.0</b>  | <b>0.0</b>  | <b>22</b> | <b>18.2</b>  | <b>D</b> |
| <b>apt</b>       | <b>LD45581</b>     | <b>86.8</b>  | <b>0.0</b>  | <b>13.2</b> | <b>0.0</b>  | <b>76</b> | <b>26.4</b>  | <b>C</b> |
| <b>PHDP</b>      | <b>RE20490</b>     | <b>78.6</b>  | <b>10.7</b> | <b>3.6</b>  | <b>7.1</b>  | <b>28</b> | <b>39.2</b>  | <b>C</b> |
| <b>CG12252</b>   | <b>SD01014</b>     | <b>100.0</b> | <b>0.0</b>  | <b>0.0</b>  | <b>0.0</b>  | <b>26</b> | <b>0.0</b>   | <b>D</b> |

**Table 3. Summary of *in situ* hybridization**

| CG9248 | Genomic PCR | 75.0 | 22.5 | 2.5 | 0.0 | 40 | 27.5 | C |
|--------|-------------|------|------|-----|-----|----|------|---|
| Sara   | LD33044     | 93.3 | 0.0  | 6.7 | 0.0 | 30 | 13.4 | D |

\*Probe: cDNA clones used to generate complementary RNA probes for *in situ* hybridization. For genes with no EST clone, DNA template for *in vitro* transcription was directly generated by PCR from the genomic sequence (Genomic PCR). Existence-uncertain genes (CG14350 and CG16803) were not tested and excluded from the list. Kif3C was tested with a full-length EST clone.

† Percent distribution of signal intensities in MBs. Hybridization signals in MBs are scanned by confocal microscopy and categorized into four grades: (-), no signal; (±), weak; (+), moderate; (++), strong. Right and left hemispheres are independently assessed. Note that hybridization signals were amplified with tyramin and exhibited variation among brains.

‡ To evaluate expression levels and reflect the variation in signal intensities among samples, points were given based on signal intensities: zero for (-), one for (±), two for (+), and three for (++). Total point was calculated as the sum of (point x % value). Expression level of each gene was then ranked in four groups according to its total point. Rank A, ≥100; rank B, 50.0-99.9; rank C, 20.0-49.9; and rank D, 0-19.9. Because of signal variation, weak-to-moderate signals were occasionally detected even for D-rank genes. Conversely, negative brains were observed for A-rank genes at varying percentages.
