# Supplementary material
Source: PubMed Central journal article supplement (PMC1599978)
Supplement: pnas_0606571103_3.pdf [file pnas_0606571103_3.pdf]

**Table 4. Summary of RNAi phenotypes**

| Gene    | RNAi line | MB defects* |           |           |            | Total, % | AL defects,<br>%(n)† | OL defects,<br>%(n)† | No. of<br>brains | Phenotypes                                                                                                                                                                                  |
|---------|-----------|-------------|-----------|-----------|------------|----------|----------------------|----------------------|------------------|---------------------------------------------------------------------------------------------------------------------------------------------------------------------------------------------|
|         |           | (-), % (n)  | (±), %(n) | (+), %(n) | (++), %(n) |          |                      |                      |                  |                                                                                                                                                                                             |
| CG4842  | 18814R-1  | 80 (16)     | 5 (1)     | 10 (2)    | 5 (1)      | 20       | 5 (1)                | 0 (0)                | 20               | Aberrant $\alpha$ -lobes (1). $\beta$ -Lobe missing (1). Faint medial lobe (2). KCs group misshaped (1). Faint ALs (1).                                                                     |
| CG13297 | 13297R-2  | 100 (20)    | 0 (0)     | 0 (0)     | 0 (0)      | 0        | 0 (0)                | 0 (0)                | 20               | None                                                                                                                                                                                        |
| CG32473 | 8775R-3   | 90 (18)     | 5 (1)     | 0 (0)     | 5 (1)      | 10       | 0 (0)                | 0 (0)                | 20               | Large calyx (1). Aberrant KC grouping (2).                                                                                                                                                  |
| CG12866 | 12866R-1  | 95 (19)     | 0 (0)     | 0 (0)     | 5 (1)      | 5        | 0 (0)                | 0 (0)                | 20               | Faint $\alpha$ -lobe (1). Aberrant medial lobes (1). Thick peduncle (1). Aberrant KCs (1).                                                                                                  |
| CG5476  | 5476R-3   | 82 (18)     | 5 (1)     | 14 (3)    | 0 (0)      | 18       | 0 (0)                | 0 (0)                | 22               | $\beta$ -Lobe fusion (4). Ectopic GFP punctuates (1).                                                                                                                                       |
| Hr46    | 11823R-4  | 70 (45)     | 16 (10)   | 8 (5)     | 6 (4)      | 30       | 0 (0)                | 0 (0)                | 64               | $\alpha$ -Lobe misshaped (5). Ectopic GFP signals near $\alpha$ -lobe (1). $\beta$ -Lobe fusion (7). $\beta'$ -Lobe crossing (1). $\beta$ -Lobe faint or misshaped (7). Split peduncle (1). |
| Dhod    | 9741R-2   | 90 (18)     | 10 (2)    | 0 (0)     | 0 (0)      | 10       | 0 (0)                | 0 (0)                | 20               | $\beta$ -Lobe fusion (2).                                                                                                                                                                   |
| CG14446 | 14446R-2  | 88 (21)     | 13 (3)    | 0 (0)     | 0 (0)      | 12       | 0 (0)                | 0 (0)                | 24               | Aberrant $\alpha$ -lobe (3).                                                                                                                                                                |
| CG2267  | 2267R-3   | 88 (15)     | 0 (0)     | 6 (1)     | 6 (1)      | 12       | 0 (0)                | 0 (0)                | 17               | $\beta$ -Lobes fusion (1). Aberrant peduncle and calyx (2).                                                                                                                                 |
| CG3371  | 3371R-2   | 90 (18)     | 5 (1)     | 5 (1)     | 0 (0)      | 10       | 0 (0)                | 0 (0)                | 20               | $\beta$ -Lobe fusion (2).                                                                                                                                                                   |
| trio    | 18214R-1  | 86 (19)     | 9 (2)     | 5 (1)     | 0 (0)      | 14       | 0 (0)                | 0 (0)                | 20               | Thin peduncle (1). $\beta$ -Lobe misshaped (2).                                                                                                                                             |
| CG7945  | 17014R-4  | 86 (18)     | 0 (0)     | 5 (1)     | 10 (2)     | 14       | 0 (0)                | 0 (0)                | 21               | $\beta$ -Lobe fusion (2). Split peduncle (1). Irregular calyx (1). Aberrant KCs (1).                                                                                                        |
| jing    | 9403R-2   | 97 (34)     | 3 (1)     | 0 (0)     | 0 (0)      | 3        | 0 (0)                | 0 (0)                | 35               | $\beta$ -Lobe fusion (1).                                                                                                                                                                   |
| CG7846  | 7846R-2   | 95 (18)     | 0 (0)     | 0 (0)     | 5 (1)      | 5        | 0 (0)                | 0 (0)                | 19               | $\beta$ -Lobe fusion (1). $\alpha$ -Lobe missing (1).                                                                                                                                       |
| CG12301 | 12301R-2  | 70 (14)     | 30 (6)    | 0 (0)     | 0 (0)      | 30       | 0 (0)                | 0 (0)                | 20               | Elongated $\alpha$ -lobe (2). $\beta$ -Lobe fusion (4).                                                                                                                                     |

**Table 4. Summary of RNAi phenotypes**

|          |          |          |        |        |        |    |       |         |    |                                                                                                                                      |
|----------|----------|----------|--------|--------|--------|----|-------|---------|----|--------------------------------------------------------------------------------------------------------------------------------------|
| CG10505  | 10505R-1 | 85 (17)  | 5 (1)  | 5 (1)  | 5 (1)  | 15 | 0 (0) | 0 (0)   | 20 | $\beta$ -Lobe misshaped (1). $\beta$ -Lobe fusion (2). Faint lobes and KCs (1).                                                      |
| CG31559  | 31559R-3 | 85 (17)  | 15 (3) | 0 (0)  | 0 (0)  | 15 | 0 (0) | 0 (0)   | 20 | Elongated $\alpha$ -lobe (1). $\beta$ -Lobe fusion (1). Aberrant KCs (1).                                                            |
| CG6372   | 6372R-2  | 57 (8)   | 14 (2) | 21 (3) | 7 (1)  | 43 | 0 (0) | 0 (0)   | 14 | $\alpha$ -Lobe disfigured (1). $\beta$ -Lobe misshaped (1). $\beta$ -Lobe missing (1). $\beta$ -Lobe fusion (2). Thick peduncle (1). |
| Brf      | 4155R-1  | 88 (14)  | 0 (0)  | 13 (2) | 0 (0)  | 12 | 0 (0) | 0 (0)   | 16 | KCs group misshaped (1). Faint medial lobes (1).                                                                                     |
| CG13604  | 13604R-1 | 95 (21)  | 5 (1)  | 0 (0)  | 0 (0)  | 5  | 0 (0) | 0 (0)   | 22 | $\beta$ -Lobe fusion (1).                                                                                                            |
| RluA-1   | 13143R-3 | 85 (17)  | 10 (2) | 0 (0)  | 5 (1)  | 15 | 0 (0) | 0 (0)   | 20 | $\alpha$ -Lobe missing (1). $\beta$ -Lobe fusion (3).                                                                                |
| CG11178  | 11178R-3 | 95 (19)  | 5 (1)  | 0 (0)  | 0 (0)  | 5  | 0 (0) | 0 (0)   | 20 | Ectopic GFP signals (1).                                                                                                             |
| CG8412   | 8412R-1  | 90 (18)  | 5 (1)  | 5 (1)  | 0 (0)  | 10 | 0 (0) | 0 (0)   | 20 | Ectopic GFP punctates (1). Aberrant KCs (1).                                                                                         |
| CG17221  | 17221R-1 | 70 (14)  | 10 (2) | 10 (2) | 10 (2) | 30 | 0 (0) | 0 (0)   | 20 | Aberrant $\alpha$ -lobe (2). $\alpha$ -Lobe missing (1). $\beta$ -Lobe fusion (3). Aberrant peduncle and calyx (1).                  |
| CG9296   | 9296R-3  | 75 (15)  | 5 (1)  | 15 (3) | 5 (1)  | 25 | 0 (0) | 75 (15) | 20 | Aberrant $\alpha$ -lobe (3). Faint medial lobes (1). $\beta$ -Lobe fusion (3). OL degeneration (15).                                 |
| CG13879  | 13879R-3 | 100 (20) | 0 (0)  | 0 (0)  | 0 (0)  | 0  | 0 (0) | 0 (0)   | 20 | None                                                                                                                                 |
| ltp-r83A | 1063R-2  | 76 (16)  | 19 (4) | 5 (1)  | 0 (0)  | 24 | 5 (1) | 0 (0)   | 21 | $\beta$ -Lobe fusion (1). Aberrant KCs (4). Faint ALs (1).                                                                           |
| CG6083   | 6083R-1  | 65 (13)  | 5 (1)  | 25 (5) | 5 (1)  | 35 | 0 (0) | 0 (0)   | 20 | Short $\alpha$ -lobe (2). $\beta$ -Lobe fusion (6).                                                                                  |
| PP2A-B'  | 7901R-2  | 92 (23)  | 8 (2)  | 0 (0)  | 0 (0)  | 8  | 0 (0) | 0 (0)   | 25 | Aberrant KCs (1). Thin $\beta$ -lobe (1).                                                                                            |
| elk      | 5076R-2  | 90 (18)  | 5 (1)  | 0 (0)  | 5 (1)  | 10 | 0 (0) | 0 (0)   | 20 | $\beta$ -Lobe fusion (1). Faint KCs and calyx (1).                                                                                   |
| CG4853   | 4853R-1  | 76 (13)  | 12 (2) | 12 (2) | 0 (0)  | 24 | 6 (1) | 0 (0)   | 17 | $\beta$ -Lobe fusion (2). Thick medial lobe (1). Faint ALs (1).                                                                      |
| CG10948  | 10948R-1 | 97 (29)  | 0 (0)  | 0 (0)  | 3 (1)  | 30 | 0 (0) | 0 (0)   | 30 | Aberrant KCs (1)                                                                                                                     |

**Table 4. Summary of RNAi phenotypes**

|            |          |          |        |        |       |    |        |       |    |                                                                                                                  |
|------------|----------|----------|--------|--------|-------|----|--------|-------|----|------------------------------------------------------------------------------------------------------------------|
| Nep1       | 5894R-1  | 100 (20) | 0 (0)  | 0 (0)  | 0 (0) | 0  | 10 (2) | 0 (0) | 20 | Ectopic neuropil near AL (2).                                                                                    |
| CG10880    | 10880R-1 | 95 (19)  | 0 (0)  | 0 (0)  | 5 (1) | 5  | 0 (0)  | 0 (0) | 20 | Split peduncle (1). Faint $\beta$ -lobe (1).                                                                     |
| CG10083    | 10083R-3 | 90 (18)  | 5 (1)  | 5 (1)  | 0 (0) | 10 | 0 (0)  | 0 (0) | 20 | $\beta$ -Lobe fusion (2).                                                                                        |
| mod (mdg4) | 7836R-2  | 91 (19)  | 10 (2) | 0 (0)  | 0 (0) | 9  | 0 (0)  | 0 (0) | 21 | Thin $\beta$ -lobe (1). Irregular peduncle (1).                                                                  |
| usp        | 4380R-1  | 80 (16)  | 20 (4) | 0 (0)  | 0 (0) | 20 | 0 (0)  | 0 (0) | 20 | Faint $\alpha$ -lobe (1). $\beta$ -Lobe fusion (1). Thin peduncle (1). Ectopic GFP signals (1).                  |
| CG7328     | 7328R-3  | 79 (15)  | 15 (3) | 5 (1)  | 0 (0) | 21 | 5 (1)  | 0 (0) | 19 | Ectopic cells (1). Thin $\alpha$ -lobe (1). $\beta$ -Lobe fusion (1). Medial lobes misshaped (1). Faint ALs (1). |
| CG2915     | 2915R-3  | 83 (15)  | 11 (2) | 6 (1)  | 0 (0) | 17 | 0 (0)  | 0 (0) | 18 | $\alpha$ -Lobe terminal misshaped (1). Swollen $\gamma$ -lobe (1). Irregular peduncle (2).                       |
| CG9248     | 9248R-4  | 85 (17)  | 0 (0)  | 10 (2) | 5 (1) | 15 | 0 (0)  | 0 (0) | 20 | Thin $\beta$ -lobe (2). Aberrant KC grouping (2).                                                                |

Anatomical MB defects caused by transgenic RNAi. Forty genes were examined. Expression of UAS-RNAi was driven by OK107, which expresses Gal4 in most MB neurons and subsets of AL and OL neurons. For each gene, two independent RNAi lines were generated and examined for structural brain defects. Data of the lines that caused higher MB defects are listed. MB defects were examined by confocal microscopy using mCD8::GFP as a reporter.

\*MB defects were categorized based on severities: (-), no defect; ( $\pm$ ), weak defect; (+), moderate defect; and (++) , strong defect. Number of brains belonging to each category is shown in parentheses. Total, percentage of brains exhibiting  $\pm$ , +, and ++ defects.

†Structural defects in ALs and OLs in the same sample sets. Note that AL defects were rare and weak. OL degeneration was caused by only CG9296.
